# Supplementary material for: Effect of a Home Health and Safety Intervention on Emergency Department Use in the Frail Elderly: A Prospective Observational Study
Source: PubMed Central journal article supplement (PMC10284516; doi:10.5811/westjem.58378), 2023-05-03
Supplement: wjem-24-522-s001.pdf [file wjem-24-522-s001.pdf]

# Demographics

Study ID \_\_\_\_\_

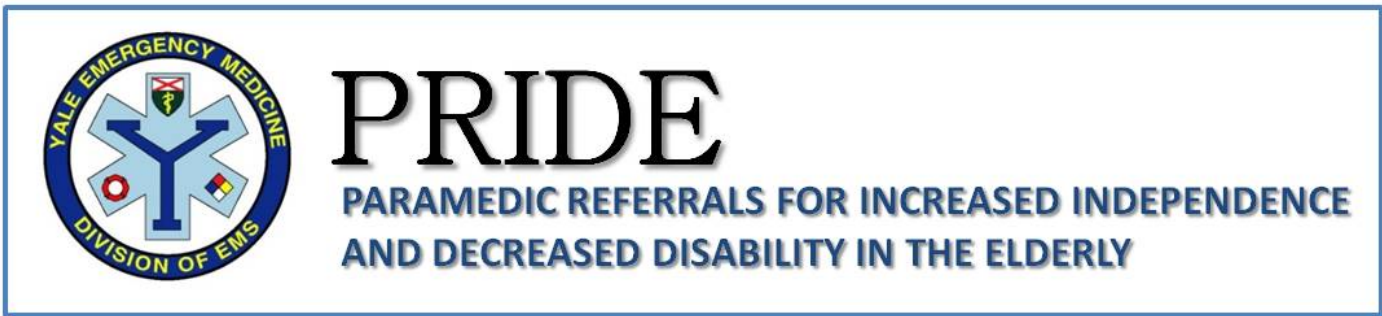

How were you referred to PRIDE?

- 911 Lift Assist
- Self Referral
- Emergency Department Referral

Select type of identifier

- Social Security Number
- Medicare Number
- Medicaid Number
- NA  
((SSN, Medicare, Medicaid))

Identifier Number \_\_\_\_\_

## CONTACT/DEMOGRAPHIC INFORMATION

Today's date \_\_\_\_\_  
(MM/DD/YYYY)

Date subject signed consent \_\_\_\_\_  
(date MM/DD/YYYY)

Last name \_\_\_\_\_

First name \_\_\_\_\_

Address \_\_\_\_\_

Town \_\_\_\_\_

State \_\_\_\_\_

Zip code \_\_\_\_\_

Home phone \_\_\_\_\_  
(Example: (203) 999-9999)

Email \_\_\_\_\_

Date of birth \_\_\_\_\_  
(date MM/DD/YYYY)

Age \_\_\_\_\_  
(Will automatically calculate)

Sex  Female  Male

Are you Hispanic/Latino?

- Yes
- No

Race/Ethnicity

- White
- Black
- Hispanic
- Asian/Pacific Islander
- American Indian/Alaska
- Other

Does subject live alone?

- Yes
- No

Does subject have a caregiver?

- Yes
- No

Name of caregiver

\_\_\_\_\_

Type of insurance

- NONE
- MEDICARE
- MEDICAID
- TRICARE
- CHAMPUS
- VA
- PRIVATE
- Medicare Advantage

**PRIMARY CARE PHYSICIAN**

Does subject have a Primary Physician?

- Yes
- No

If no, where does the subject receive primary care?

\_\_\_\_\_

Name of primary physician

\_\_\_\_\_

Address

\_\_\_\_\_

Town

\_\_\_\_\_

State

\_\_\_\_\_

Zip code

\_\_\_\_\_

Phone number

\_\_\_\_\_ (Example: (203) 999-9999)

**SPECIALIST PHYSICIAN**

Does subject have a specialist?

- Yes
- No

Special physician (type)

\_\_\_\_\_

Name of specialist

\_\_\_\_\_

Address

\_\_\_\_\_

Town

\_\_\_\_\_

State

---

Zip code

---

Phone number

---

DO NOT FORGET TO SELECT FORM STATUS AND SAVE FORM

# Physical Disability

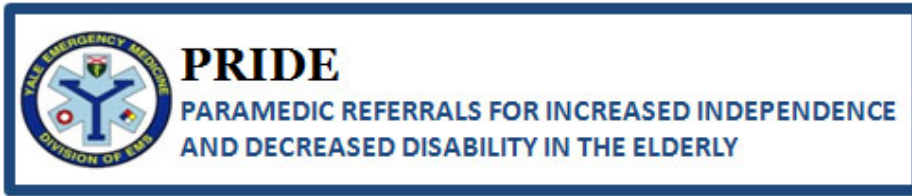

## PHYSICAL DISABILITY

Before your fall, did you need any help with everyday activities?

- Often
- Sometimes
- Only occasionally
- Rarely or Never

Score for question 1

\_\_\_\_\_ (Automatically calculated)

Are you able to take care of all your personal needs by yourself? (e.g., brushing your teeth, combing your hair)

- Yes (maybe with cane, walker, or other device)
- Somebody helps with these activities
- Dependent on somebody to perform these activities

Are you able to take a bath or shower by yourself?

- Yes (maybe with a cane, walker, or other device)
- Somebody helps with these activities
- Dependent on somebody to perform these activities

Are you able to dress yourself?

- Yes (maybe with a cane, walker, or other device)
- Somebody helps with these activities
- Dependent on somebody to perform these activities

Are you able to get on and off the toilet or bedside commode by yourself?

- Yes (maybe with a cane, walker, or other device)
- Somebody helps with these activities
- Dependent on somebody to perform this

Are you able to get off the bed or out of a chair by yourself?

- Yes (maybe with a cane, walker, or other device)
- Somebody helps with these activities
- Dependent on somebody to perform these activities

Are you able to walk ok, once in a standing position?

- Yes (maybe with a cane, walker, or other device)
- Somebody helps with these activities
- Dependent on somebody to perform this

Physical disability is scored automatically. Verify Physical Disability Score with table below.

| SUM   | = | DISABILITY SCORE |
|-------|---|------------------|
| 16-23 | = | 1                |
| 13-15 | = | 2                |
| 10-12 | = | 3                |
| 7-9   | = | 4                |
| 6     | = | 5                |

Sum of questions

\_\_\_\_\_

Physical Disability Score

\_\_\_\_\_

DO NOT FORGET TO SELECT FORM STATUS AND SAVE FORM

# Loss



## LOSS

In the past year, have you experienced the death or incapacity of someone who used to help take care of you? (i.e., they are now no longer able to help care for you)

- Yes
- No

If yes, who?

- Spouse/Partner
- Family Member/Relative
- Close Friend
- Paid Caregiver
- Other

If other, who?

\_\_\_\_\_

Is there anyone who you help care for that has suffered a serious illness or incapacity, in the past year? (i.e., are you now responsible for taking care of someone else?)

- Yes
- No

If yes, who?

- Spouse/Partner
- Family Member/Relative
- Close Friend
- Other

If other, who?

\_\_\_\_\_

DO NOT FORGET TO SELECT FORM STATUS AND SAVE FORM

# Health Care Utilization



## HEALTH CARE UTILIZATION

How many times has someone called 9-1-1 for medical assistance for you in the past month?

- Never
- Once
- Twice
- More than twice

How many times have you been a patient in the ER in the past year?

- Never
- Once
- Twice
- More than twice

How many times have you been hospitalized (overnight) in the past year?

- Never
- Once
- Twice
- More than twice

How many times have you been admitted to an extended care facility in the past year? (i.e., assisted living, rehab, nursing home)

- Never
- Once
- Twice
- More than twice

DO NOT FORGET TO SELECT FORM STATUS AND SAVE FORM

# Mental Status

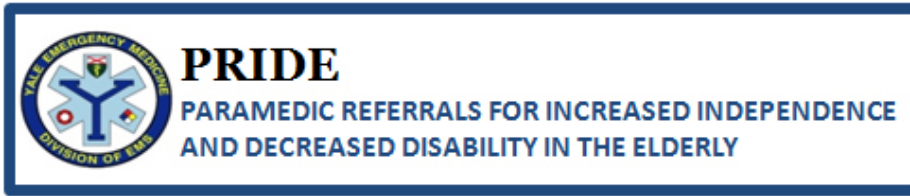

## MINI-MENTAL STATUS EXAM - PART 1

Begin a mini-mental status exam. Say the following to the subject:

*"I am going to name three objects, and I want you to try to remember them for me. I'll ask you to name them in a few minutes. The three objects are an egg, a boat, and a pencil."*

Have the patient repeat the three items back.

INITIAL SCORE:

Give three points if the patient can repeat them back right away, two points if you have to repeat the items once, one point if you have to repeat them twice, and zero points if you have to repeat them more than twice, or if the patient just can't remember them.

Say the items again as needed until the patient can repeat all three.

**DO NOT PROMPT THE SUBJECT WITH THE ITEMS AGAIN UNTIL THE SCORE HAS BEEN ASSIGNED**

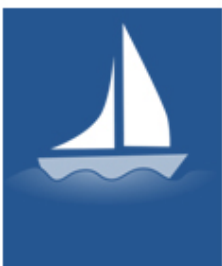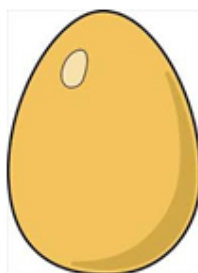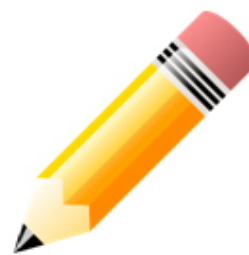

Initial Score:

- 0  
 1  
 2  
 3

Is the individual oriented to person?

- Yes  
 No

Is the individual oriented to place?

- Yes  
 No

Is the individual oriented to time?

- Yes  
 No

Is the individual oriented to situation?

- Yes  
 No

DO NOT FORGET TO SELECT FORM STATUS AND SAVE FORM



# Blood Pressure

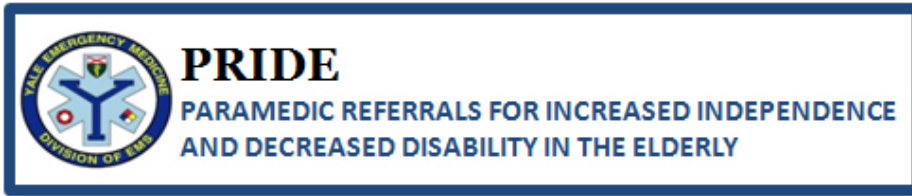

## ORTHOSTATIC BLOOD PRESSURE

1. Have the patient lie down for 5 minutes
2. Measure blood pressure and pulse rate.
3. Have the patient stand.
4. Repeat blood pressure and pulse rate measurements after standing 1 and 3 minutes.

A drop in BP of  $\geq 20$  mm Hg, or in diastolic BP of  $\geq$  mm Hg, or experiencing lightheadedness or dizziness is considered abnormal.

Lying Down Systolic BP - 5 Minutes \_\_\_\_\_

Lying Down Diastolic BP - 5 Minutes \_\_\_\_\_

Lying Down Heart Rate - 5 Minutes \_\_\_\_\_

Associated Symptoms - 5 minutes \_\_\_\_\_

Standing Systolic Bp - 1 Minute \_\_\_\_\_

Standing Diastolic BP - 1 Minute \_\_\_\_\_

Standing Heart Rate- 1 Minute \_\_\_\_\_

Associated Symptoms - 1 Minute \_\_\_\_\_

Standing Systolic BP - 3 Minutes \_\_\_\_\_

Standing Diastolic BP - 3 Minutes \_\_\_\_\_

Standing Heart Rate- 3 Minutes \_\_\_\_\_

Associated Symptoms - 3 Minutes \_\_\_\_\_

DO NOT FORGET TO SELECT FORM STATUS AND SAVE FORM

# Mental Status2



## MINI-MENTAL STATUS EXAM - PART 2

Once you have completed measuring orthostatic blood pressure ask the subject again:

*"Can you tell me the three items I asked you to remember earlier?"*

Have the patient repeat the three items back.

INITIAL SCORE:

Give three points if the patient can repeat them back right away, two points if you have to repeat the items once, one point if you have to repeat them twice, and zero points if you have to repeat them more than twice, or if the patient just can't remember them.

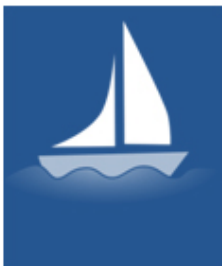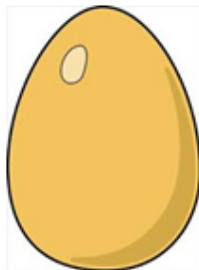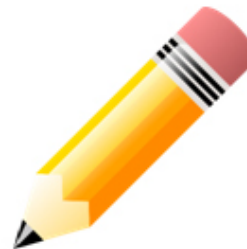

FINAL SCORE:

- 0
- 1
- 2
- 3

DO NOT FORGET TO SELECT FORM STATUS AND SAVE FORM

# Risk Inventory

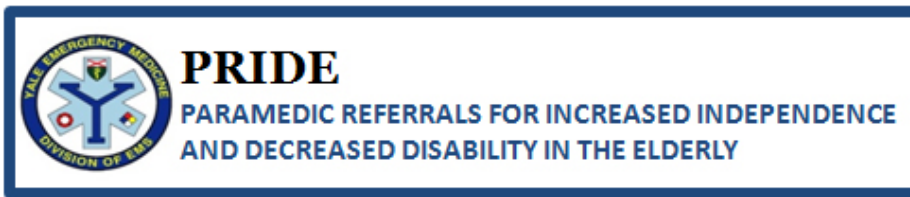

## FALLING - RISK INVENTORY QUESTIONNAIRE

- Is it an effort for you to go down stairs?  Yes  
 No
- Do your hands shake?  Yes  
 No
- Do you wear shoes with rubber soles?  Yes  
 No
- Do you use diuretics?  Yes  
 No
- Do you get lightheaded when you urinate or have a bowel movement?  Yes  
 No
- When you get up in the morning, do you need to remain seated on the bed for a few minutes before standing up?  Yes  
 No
- Do you get dizzy when you turn your head?  Yes  
 No
- Do you have trouble looking down when you walk?  Yes  
 No
- Do you spend most of your time at home seated?  Yes  
 No
- Do you feel faint when you stand for a while?  Yes  
 No
- In the morning, do you need to sit up and stand up slowly?  Yes  
 No
- Do you experience problems lacing your shoes?  Yes  
 No
- Do you experience problems in getting dressed while standing?  Yes  
 No
- When you walk, do your legs hurt?  Yes  
 No
- When you are at home, do you wear slippers?  Yes  
 No

DO NOT FORGET TO SELECT FORM STATUS AND SAVE FORM

# Assistance Needs



## ASSISTANCE NEEDS

Do you have people coming to your home to assist you?

- Yes
- No

Are you comfortable with having people coming into your home to assist you?

- Yes
- No

Do you drive?

- Yes
- No

Are you familiar with the resources that are available to you in the community?

- Yes
- No

Do you use public transportation?

- Yes
- No

Do you have someone drive you to your doctor's appointments?

- Yes
- No

Do you want to stay in your home as long as possible?

- Yes
- No

Do you worry about being able to maintain your independence?

- Yes
- No

DO NOT FORGET TO SELECT FORM STATUS AND SAVE FORM

# Home Safety

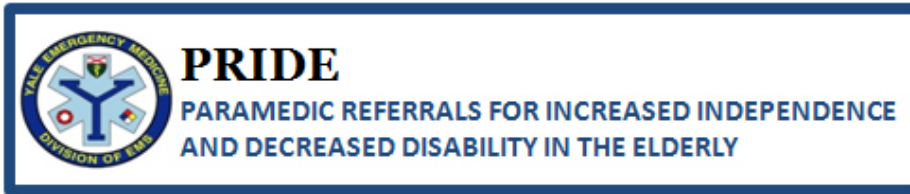

---

## HOME SAFETY CHECKLIST

### PORCH, YARD, OUTSIDE

- Is the path from the house to the garage well lit?  Yes  
 No  
 NA
- Are there cracks or buckles on the sidewalks or driveway?  Yes  
 No  
 NA
- Are there hoses, weeds or other obstacles on the walkways?  Yes  
 No
- Are your steps or walkways icy steps in the winter?  Yes  
 No

---

## BATHROOM

- Is the path from the bedroom to the bathroom well lit?  Yes  
 No
- Are there grab bars near the toilet and in the shower and bathtub?  Yes  
 No
- Does the shower have a shower seat?  Yes  
 No
- Do the bathmats have slip-resistant backing?  Yes  
 No
- Is there soap buildup in the shower/bathtub?  Yes  
 No
- Can the subject reach soap in the shower without bending down or turning too far around (more than 90 degrees)?  Yes  
 No
- Does the subject have a standard (15 inch high) toilet seat?  Yes  
 No
- Does the subject have an ADA (17-19 inch high) toilet seat?  Yes  
 No

---

---

**BEDROOM**

- Is there a table close to your bed with a lamp and room to store eyeglasses and a phone?  Yes  
 No
- Are cords pushed back against the wall?  Yes  
 No
- Is there clutter on the floor?  Yes  
 No
- 
- 

**KITCHEN**

- Are throw rugs/floor mats secure?  Yes  
 No
- Can you get to regularly used items without bending down or reaching up too far (beyond flat footed reach)?  Yes  
 No
- Does the home have a working smoke detector?  Yes  
 No
- 
- 

**LIVING AREA**

- Are floor coverings secure and sturdy?  Yes  
 No
- Can the subject answer the phone without getting up?  Yes  
 No
- Can the subject turn on a light without having to walk into a dark room?  Yes  
 No
- Does the subject have a cordless or cellular phone or an emergency alarm device?  Yes  
 No
- Is the floor free of clutter?  Yes  
 No
- Is it easy to walk around the furniture in the home?  Yes  
 No
- Can the subject pull cords to lights or ceiling fans without reaching up?  Yes  
 No
- Are there handrails on both sides of the stairways in the home?  Yes  
 No
- Are the steps on the stairways even and safe?  Yes  
 No
- Is there adequate lighting in the stairwell with light switches at the top and the bottom of the stairs?  Yes  
 No

DO NOT FORGET TO SELECT FORM STATUS AND SAVE FORM

# Timed Up and Go Test



## BALANCE ASSESSMENT

### THE TIMED UP AND GO (TUG) TEST

**PURPOSE:** To assess mobility. An adult who takes  $\geq 12$  seconds to complete the TUG is at high risk for falling.

**DIRECTIONS:** Patients wear their regular footwear and can use a walking aid if needed.

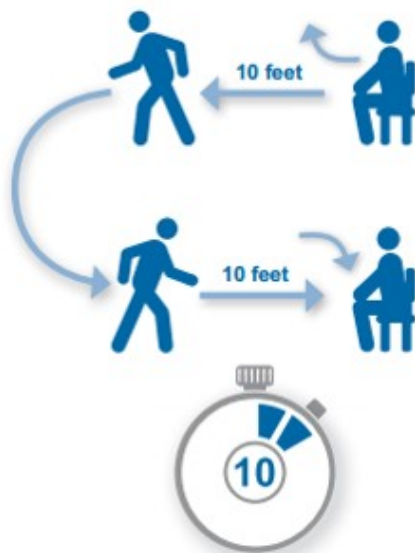

#### Instructions

- Ask the patient to sit in a standard chair.
- Tape a line on the floor 10 feet away.
- Tell the patient to "Stand up from the chair, walk at your normal pace to the line on the floor, turn, walk back to the chair, and sit down again."
- Repeat 3 times and average trials 2 and 3.
- Average time  $> 12$  seconds suggests high risk.

**In addition, the TUG test may reveal several characteristic gait patterns.**

#### Normative Reference Values by Age

| Age Group     | Time in Seconds (95% Confidence Interval) |               |
|---------------|-------------------------------------------|---------------|
| 60 – 69 years | 8.1                                       | (7.1 – 9.0)   |
| 70 – 79 years | 9.2                                       | (8.2 – 10.2)  |
| 80 – 99 years | 11.3                                      | (10.0 – 12.7) |

Assess mobility using the TUG Test

\_\_\_\_\_ (Measure in seconds)

#### OBSERVATION

Slow tentative pace

- Yes  
 No

Loss of balance

- Yes  
 No

- Short strides  Yes  
 No
  
- Little or no arm swing  Yes  
 No
  
- Steadying self on walls  Yes  
 No
  
- Shuffling  Yes  
 No
  
- En bloc turning (The head's fixed to the body and joints are stiff. Turns are slow, often via multiple steps instead of a pivot)  Yes  
 No
  
- Not using assistive device properly  Yes  
 No
  
- Sits down in the chair hard  Yes  
 No
  
- Has difficulty getting out of the chair  Yes  
 No

DO NOT FORGET TO SELECT FORM STATUS AND SAVE FORM



# Chair Stand



## BALANCE ASSESSMENT

**PURPOSE:** To test leg strength and endurance. A below average score indicates a high risk for falls.

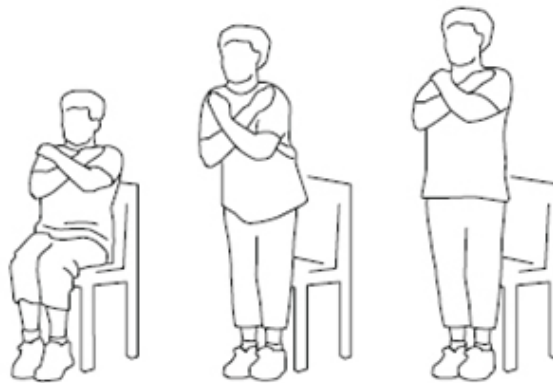

On "Go," begin timing.

If the patient must use his/her arms to stand, stop the test. Record "0" for the number and score. Count the number of times the patient comes to a full standing position in 30 seconds. If the patient is over halfway to a standing position when 30 seconds have elapsed, count it as a stand.

Record the number of times the patient stands in 30 seconds.

### CHAIR STAND—BELOW AVERAGE SCORES

| Age   | Men  | Women |
|-------|------|-------|
| 60-64 | < 14 | < 12  |
| 65-69 | < 12 | < 11  |
| 70-74 | < 12 | < 10  |
| 75-79 | < 11 | < 10  |
| 80-84 | < 10 | < 9   |
| 85-89 | < 8  | < 8   |
| 90-94 | < 7  | < 4   |

Number of times in 30 seconds subject can stand.

---

DO NOT FORGET TO SELECT FORM STATUS AND SAVE FORM

# Functional Reach



## BALANCE ASSESSMENT

### FUNCTIONAL REACH TEST

**PURPOSE:** A quick and simple, single-task dynamic test that defines functional reach as the maximal distance one can reach forward beyond arm's length, while maintaining a fixed base of support in the standing position.

**INSTRUCTIONS:**

1. Tape a line on the floor and a yardstick to the wall.
2. Explain to the participant:

*"I am interested in how far you can reach forward while you are standing. It is important that your feet stay in the same place and that you do not fall. I will ask you to stand sideways next the wall and place a ruler horizontally on the wall at your shoulder height. Then you will raise your straight arms out in front of you*

*and make a fist. This is the starting position. I will mark this point on the ruler. Then I will ask you to reach forward without moving your feet whilst keeping your hands in a fist shape. I will then mark this new position and ask you to return to the starting position."*

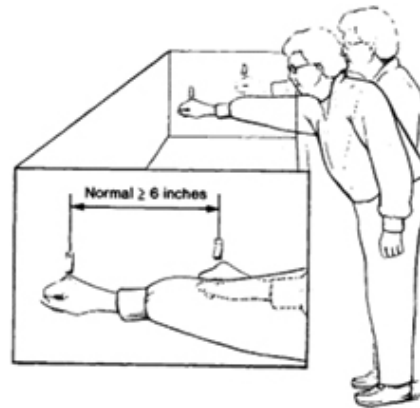

3. Demonstrate for the subject.
4. The subject is instructed to stand next to, but not touching the wall and to position the arm that is closer to the wall at 90° of shoulder flexion with a closed fist.
5. Place the ruler horizontally on the wall and secure appropriately. Scores are determined by assessing the difference between the start and end position is the reach distance in inches.

A Reach Score of 6 inches or less indicates that an individual is at a high risk of for falls.

Record starting position at 3rd metacarpal head on the ruler.

\_\_\_\_\_ (Measure in inches)

Ask the subject to "Reach forward as far as you can without taking a step and keeping your hands in a fist shape."

Measure location of 3rd metacarpal head on the ruler.

\_\_\_\_\_ (Measure in inches)

Second time - With the subject in the starting position - measure location of 3rd metacarpal head on the ruler.

\_\_\_\_\_ (Measure in inches)

Second time - Have the subject reach - measure location of 3rd metacarpal head on the ruler.

\_\_\_\_\_ (Measure in inches)

What is the average distance reached?

\_\_\_\_\_

DO NOT FORGET TO SELECT FORM STATUS AND SAVE FORM

# Stage4 Balance Test



## BALANCE ASSESSMENT

### THE 4-STAGE BALANCE TEST

**PURPOSE:** To assess static balance. An older adult who cannot hold the tandem stance for at least 10 seconds is at increased risk of falling.

**DIRECTIONS:**

- There are four progressively more challenging positions. Patients should not use an assistive device (cane or walker) and keep their eyes open.
- Describe and demonstrate each position. Stand next to the patient, hold his/her arm and help them assume the correct foot position.
- When the patient is steady, let go, but remain ready to catch the patient if he/she should lose their balance.
- If the patient can hold a position for 10 seconds without moving his/her feet or needing support, go on to the next position. If not, stop the test.

**INSTRUCTION TO SUBJECT:**

*I'm going to show you four positions. Try to stand in each position for 10 seconds. You can hold your arms out or move your body to help keep your balance but don't move your feet. Hold this position until I tell you to stop.*

For each stage, say "Ready, begin" and begin timing. After 10 seconds, say "Stop."

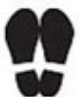

#### FEET SIDE BY SIDE

Stand with feet side by side.

\_\_\_\_\_ (Time in seconds)

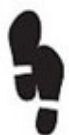

#### INSTEP OF ONE FOOT TOUCHING BIG TOE OF OTHER FOOT

Place the instep of one foot so it is touching the big toe of the other foot.

\_\_\_\_\_ (Time in seconds)

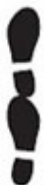

**ONE FOOT IN FRONT OF THE OTHER HEEL TOUCHING TOE**

Place one foot in front of the other heel touching toe.

\_\_\_\_\_ (Time in seconds)

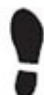

**STAND ON ONE FOOT**

Stand on one foot.

\_\_\_\_\_ (Time in seconds)

DO NOT FORGET TO SELECT FORM STATUS AND SAVE FORM

# Notes1

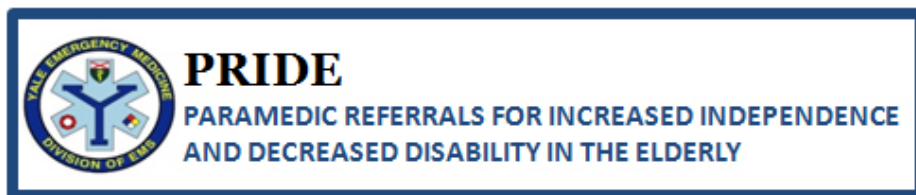

---

## NOTES

Notes

DO NOT FORGET TO SELECT FORM STATUS AND SAVE FORM

# Appointment Form



---

---

## REFERRAL FORM FOR RESEARCHERS

Name: [fname] [lname]

Address: [street\_address]

Town/State/Zip: [town], [state], [zip]

Home Phone: [hphone]

Email: [email]

---

---

## PRIMARY CARE REFERRAL

Primary Physician: [pp\_name]

Address: [pp\_st\_address]

Town/State/Zip: [pp\_town], [pp\_state],[pp\_zip]

Phone: [pp\_phone]

Date of appointment \_\_\_\_\_  
(MM/DD/YYYY)

Time of appointment \_\_\_\_\_  
(HH:MM)

---

---

## TRANSPORTATION ARRANGEMENTS

Select transportation service  Metro Taxi  AMR

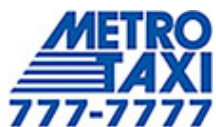



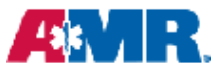

Time of pickup

\_\_\_\_\_  
(HH:MM)

LEAVE BEHIND THE APPROPRIATE REMINDER CARD FOR THE PATIENT

---

---

**VNA APPOINTMENT**

Does patient have an existing VNA?

- Yes
- No

If yes, name of existing VNA.

\_\_\_\_\_

VNA - Name\Phone

(When calling specify this is a PRIDE referral.  
If needed, ask for contact listed.)

Date of home visit

\_\_\_\_\_  
(MM/DD/YYYY)

Time of home visit

\_\_\_\_\_  
(HH:MM)

---

---

**REASON FOR REFERRAL**

Gait or mobility problems

- Yes
- No

Balance Difficulties

- Yes
- No

Lower Body Weakness

- Yes
- No

Medication Review & Consultation

- Yes
- No

Postural Hypotension

- Yes
- No

Other reason for follow up

\_\_\_\_\_

---

---

**NOTES**

Notes

DO NOT FORGET TO SELECT FORM STATUS AND SAVE FORM

# VNA Use




---

## REFERRAL FORM FOR VNA

Name: [paramedics\_arm\_1][fname] [paramedics\_arm\_1][lname]

Address: [paramedics\_arm\_1][street\_address]

Town/State/Zip: [paramedics\_arm\_1][town], [paramedics\_arm\_1][state], [paramedics\_arm\_1][zip]

Home Phone: [paramedics\_arm\_1][hphone]

Email: [paramedics\_arm\_1][email]

Date of VNA Appointment: [paramedics\_arm\_1][vnappoint]

Time of VNA Appointment: [paramedics\_arm\_1][vnatime]

---

## PRIMARY CARE REFERRAL

Primary Physician: [paramedics\_arm\_1][pp\_name]

Address: [paramedics\_arm\_1][pp\_st\_address]

Town/State/Zip:: [paramedics\_arm\_1][pp\_town], [paramedics\_arm\_1][pp\_state], [paramedics\_arm\_1][pp\_zip]

Phone: [paramedics\_arm\_1][pp\_phone]

Date of Appointment:: [paramedics\_arm\_1][ppappoint]

Time of Appointment: [paramedics\_arm\_1][pptime]

---

## VNA PATIENT REVIEW

Is the patient alone for more than 24 hours without someone checking on them?

Yes  
 No

Gait or Mobility Problems

Yes  
 No

Does the patient hesitate when they get up to move?

Yes  
 No

Balance Difficulties

Yes  
 No

Lower Body Weakness

Yes  
 No

Suspected Neurological Condition

- Yes
- No

Medication Review & Consultation

- Yes
- No

Does the patient have any dangerous medication interactions?

- Yes
- No

If yes, how many dangerous medication interactions does the patient have?

\_\_\_\_\_

MEDICATION INTERACTION 1 - Drug 1 name

\_\_\_\_\_

Drug 2 name

\_\_\_\_\_

Potential effect

\_\_\_\_\_

Recommendation

\_\_\_\_\_

MEDICATION INTERACTION 2 - Drug 1 name

\_\_\_\_\_

Drug 2 name

\_\_\_\_\_

Potential effect

\_\_\_\_\_

Recommendation

\_\_\_\_\_

MEDICATION INTERACTION 3 - Drug 1 name

\_\_\_\_\_

Drug 2 name

\_\_\_\_\_

Potential effect

\_\_\_\_\_

Recommendation

\_\_\_\_\_

MEDICATION INTERACTION 4 - Drug 1 name

\_\_\_\_\_

Drug 2 name

\_\_\_\_\_

Potential effect

\_\_\_\_\_

Recommendation

\_\_\_\_\_

MEDICATION INTERACTION 5 - Drug 1 name

\_\_\_\_\_

Drug 2 name

\_\_\_\_\_

Potential effect

\_\_\_\_\_

Recommendation

\_\_\_\_\_

Postural Hypotension

- Yes
- No

Foot Abnormalities

- Yes
- No

Vision

- Glasses
- Impaired
- Blurred

Problems With Heart Rate and/or Rhythm

- Rate
- Rhythm
- Both

Environmental Safeguards

- Yes
- No

Do you take sleeping aids?

- Yes
- No

If yes, please list sleeping aid(s).

\_\_\_\_\_

Medication Change Recommended

- Yes
- No

Medication Change

\_\_\_\_\_

Durable Medical Equipment

- Yes
- No

List durable medical equipment

\_\_\_\_\_

Is the durable medical equipment in good repair?

- Yes
- No

Notes

\_\_\_\_\_

Do you have an Emergency Response System?

- Yes
- No

If yes, please specify EMR.

\_\_\_\_\_

If no, are you interested in an EMR?

- Yes
- No

ONGOING CARE NEEDS (FILLED IN BY VNA)

Physical Therapy

- Yes
- No

OCC Therapy

- Yes
- No

Home Nursing

- Yes
- No

Home Safety

- Yes
- No

Ongoing Care Needs

- Yes
- No

Does the patient present any apparent mental status problems?

- Yes
- No

Do you recommend that their primary caregiver become their primary contact?

- Yes
- No

VNA Recommendations/Notes

\_\_\_\_\_

DO NOT FORGET TO SELECT FORM STATUS AND SAVE FORM

# Office Use - Hospital

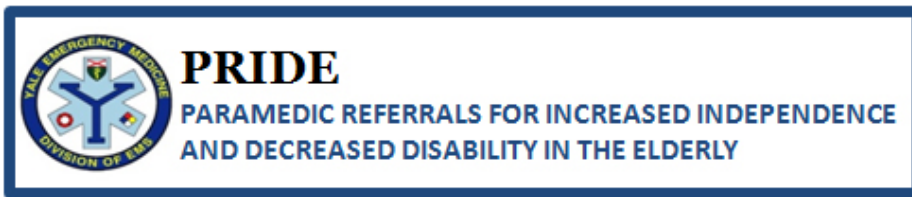

---

## HOSPITALIZATION

Has the subject been hospitalized since entering the program?

- Yes
- No

How many times?

- 1
- 2
- 3
- 4
- 5

Which hospital

\_\_\_\_\_

Reason for admission?

\_\_\_\_\_

Date of admission

\_\_\_\_\_  
(MM/DD/YYYY)

Was surgery required?

- Yes
- No

Discharge summary admission

Date of discharge

\_\_\_\_\_  
(MM/DD/YYYY)

Length of stay

\_\_\_\_\_

Cost of stay

\_\_\_\_\_

### HOSPITAL STAY 2

Reason for second admission?

\_\_\_\_\_

Date of second admission

\_\_\_\_\_  
(MM/DD/YYYY)

Was surgery required for second admission?

- Yes
- No

Discharge summary second admission

Date of second discharge

\_\_\_\_\_  
(MM/DD/YYYY)

Length of stay second admission

\_\_\_\_\_

Cost of stay second admission

\_\_\_\_\_

### HOSPITAL STAY 3

Reason for third admission?

\_\_\_\_\_

Date of third admission \_\_\_\_\_  
(MM/DD/YYYY)

Was surgery required for third admission?  
 Yes  
 No

Discharge summary third admission \_\_\_\_\_

Date of third discharge \_\_\_\_\_  
(MM/DD/YYYY)

Length of stay third admission \_\_\_\_\_

Cost of stay third admission \_\_\_\_\_

HOSPITAL STAY 4

Reason for fourth admission \_\_\_\_\_

Date of fourth admission \_\_\_\_\_  
(MM/DD/YYYY)

Was surgery required for fourth admission?  
 Yes  
 No

Discharge summary fourth admission \_\_\_\_\_

Date of fourth discharge \_\_\_\_\_  
(MM/DD/YYYY)

Length of stay of fourth admission \_\_\_\_\_

Cost of stay fourth admission \_\_\_\_\_

HOSPITAL STAY 5

Reason for fifth admission \_\_\_\_\_

Date of fifth admission \_\_\_\_\_  
(MM/DD/YYYY)

Was surgery required for fifth admission?  
 Yes  
 No

Discharge summary fifth admission \_\_\_\_\_

Date of fifth discharge \_\_\_\_\_  
(MM/DD/YYYY)

Length of stay of fifth admission \_\_\_\_\_

Cost of stay fifth admission \_\_\_\_\_

DO NOT FORGET TO SELECT FORM STATUS AND SAVE FORM

# Office Use - Death



Date of death

\_\_\_\_\_ (MM/DD/YYYY)

Cause of death

\_\_\_\_\_

DO NOT FORGET TO SELECT FORM STATUS AND SAVE FORM



# Office Use - Completion Data



---

---

## STUDY INFORMATION

Subject completed study

- Yes
- No

Subject withdrawal date

\_\_\_\_\_ (MM/DD/YYYY)

Reason for withdrawal

\_\_\_\_\_

Study completion date

\_\_\_\_\_ (MM/DD/YYYY)

---

---

## GENERAL COMMENTS

Comments about the study

\_\_\_\_\_

DO NOT FORGET TO SELECT FORM STATUS AND SAVE FORM

# Office Use - Medication



## MEDICATION LIST

How many medications do you take?

\_\_\_\_\_ (Indicate number of medications up to 30.)

In the past month, has there been a change to your medications?

- Yes
- No
- NA

If yes, how?

- New medication
- stopped medication
- change in dosage
- change in frequency

Which medication?

\_\_\_\_\_  
\_\_\_\_\_

Name of Medication 1

Class of Medication

- Anticoagulants
- Antidepressants
- Antipsychotics
- Beta-blockers
- Diuretics
- (Other) Antihypertensives
- NSAIDs
- Narcotics
- Opioids
- Benzodiazepines
- (Other) Sedatives
- Other

Dosage

\_\_\_\_\_

Frequency

- 1xday
- 2xday
- 3xday
- 4xday
- PRN

If PRN How often do you take the medication?

\_\_\_\_\_

Name of Medication 2

\_\_\_\_\_

Class Of Medication

- Anticoagulants
- Antidepressants
- Antipsychotics
- Beta-blockers
- Diuretics
- (Other) Antihypertensives
- NSAIDs
- Narcotics
- Opioids
- Benzodiazepines
- (Other) Sedatives
- Other

Dosage

\_\_\_\_\_

Frequency

- 1xday
- 2xday
- 3xday
- 4xday
- PRN

If PRN How often do you take the medication?

\_\_\_\_\_

Name of Medication 3

\_\_\_\_\_

Class Of Medication

- Anticoagulants
- Antidepressants
- Antipsychotics
- Beta-blockers
- Diuretics
- (Other) Antihypertensives
- NSAIDs
- Narcotics
- Opioids
- Benzodiazepines
- (Other) Sedatives
- 

Dosage

\_\_\_\_\_

Frequency

- 1xday
- 2xday
- 3xday
- 4xday
- PRN

If PRN How often do you take the medication?

\_\_\_\_\_

Name of Medication 4

\_\_\_\_\_

Class of Medication

- Anticoagulants
- Antidepressants
- Antipsychotics
- Beta-blockers
- Diuretics
- (Other) Antihypertensives
- NSAIDs
- Narcotics
- Opioids
- Benzodiazepines
- (Other) Sedatives
- 

Dosage

\_\_\_\_\_

Frequency

- 1xday
- 2xday
- 3xday
- 4xday
- PRN

If PRN How often dow you take the medication?

\_\_\_\_\_

Name of Medication 5

\_\_\_\_\_

Class of Medication

- Anticoagulants
- Antidepressants
- Antipsychotics
- Beta-blockers
- Diuretics
- (Other) Antihypertensives
- NSAIDs
- Narcotics
- Opioids
- Benzodiazepines
- (Other) Sedatives
- 

Dosage

\_\_\_\_\_

Frequency

- 1xday
- 2xday
- 3xday
- 4xday
- PRN

If PRN How often dow you take the medication?

\_\_\_\_\_

Name of Medication 6

\_\_\_\_\_

Class of Medication

- Anticoagulants
- Antidepressants
- Antipsychotics
- Beta-blockers
- Diuretics
- (Other) Antihypertensives
- NSAIDs
- Narcotics
- Opioids
- Benzodiazepines
- (Other) Sedatives
- 

Dosage

\_\_\_\_\_

Frequency

- 1xday
- 2xday
- 3xday
- 4xday
- PRN

If PRN How often dow you take the medication?

\_\_\_\_\_

Name of Medication 7

\_\_\_\_\_

Class of Medication

- Anticoagulants
- Antidepressants
- Antipsychotics
- Beta-blockers
- Diuretics
- (Other) Antihypertensives
- NSAIDs
- Narcotics
- Opioids
- Benzodiazepines
- (Other) Sedatives
- 

Dosage

\_\_\_\_\_

Frequency

- 1xday
- 2xday
- 3xday
- 4xday
- PRN

If PRN How often do you take the medication?

\_\_\_\_\_

Name of Medication 8

\_\_\_\_\_

Class of Medication

- Anticoagulants
- Antidepressants
- Antipsychotics
- Beta-blockers
- Diuretics
- (Other) Antihypertensives
- NSAIDs
- Narcotics
- Opioids
- Benzodiazepines
- (Other) Sedatives
- 

Dosage

\_\_\_\_\_

Frequency

- 1xday
- 2xday
- 3xday
- 4xday
- PRN

If PRN How often do you take the medication?

\_\_\_\_\_

Name of Medication 9

\_\_\_\_\_

Class of Medication

- Anticoagulants
- Antidepressants
- Antipsychotics
- Beta-blockers
- Diuretics
- (Other) Antihypertensives
- NSAIDs
- Narcotics
- Opioids
- Benzodiazepines
- (Other) Sedatives
- 

Dosage

\_\_\_\_\_

Frequency

- 1xday
- 2xday
- 3xday
- 4xday
- PRN

If PRN How often dow you take the medication?

\_\_\_\_\_

Name of Medication 10

\_\_\_\_\_

Class of Medication

- Anticoagulants
- Antidepressants
- Antipsychotics
- Beta-blockers
- Diuretics
- (Other) Antihypertensives
- NSAIDs
- Narcotics
- Opioids
- Benzodiazepines
- (Other) Sedatives
- 

Dosage

\_\_\_\_\_

Frequency

- 1xday
- 2xday
- 3xday
- 4xday
- PRN

If PRN How often dow you take the medication?

\_\_\_\_\_

Name of Medication 11

\_\_\_\_\_

Class of Medication

- Anticoagulants
- Antidepressants
- Antipsychotics
- Beta-blockers
- Diuretics
- (Other) Antihypertensives
- NSAIDs
- Narcotics
- Opioids
- Benzodiazepines
- (Other) Sedatives
- 

Dosage

\_\_\_\_\_

Frequency

- 1xday
- 2xday
- 3xday
- 4xday
- PRN

If PRN How often dow you take the medication?

\_\_\_\_\_

Name of Medication 12

\_\_\_\_\_

Class of Medication

- Anticoagulants
- Antidepressants
- Antipsychotics
- Beta-blockers
- Diuretics
- (Other) Antihypertensives
- NSAIDs
- Narcotics
- Opioids
- Benzodiazepines
- (Other) Sedatives
- 

Dosage

\_\_\_\_\_

Frequency

- 1xday
- 2xday
- 3xday
- 4xday
- PRN

If PRN How often do you take the medication?

\_\_\_\_\_

Name of Medication 13

\_\_\_\_\_

Class of Medication

- Anticoagulants
- Antidepressants
- Antipsychotics
- Beta-blockers
- Diuretics
- (Other) Antihypertensives
- NSAIDs
- Narcotics
- Opioids
- Benzodiazepines
- (Other) Sedatives
- 

Dosage

\_\_\_\_\_

Frequency

- 1xday
- 2xday
- 3xday
- 4xday
- PRN

If PRN How often do you take the medication?

\_\_\_\_\_

Name of Medication 14

\_\_\_\_\_

Class of Medication

- Anticoagulants
- Antidepressants
- Antipsychotics
- Beta-blockers
- Diuretics
- (Other) Antihypertensives
- NSAIDs
- Narcotics
- Opioids
- Benzodiazepines
- (Other) Sedatives
- 

Dosage

\_\_\_\_\_

Frequency

- 1xday
- 2xday
- 3xday
- 4xday
- PRN

If PRN How often dow you take the medication?

\_\_\_\_\_

Name of Medication 15

\_\_\_\_\_

Class of Medication

- Anticoagulants
- Antidepressants
- Antipsychotics
- Beta-blockers
- Diuretics
- (Other) Antihypertensives
- NSAIDs
- Narcotics
- Opioids
- Benzodiazepines
- (Other) Sedatives
- 

Dosage

\_\_\_\_\_

Frequency

- 1xday
- 2xday
- 3xday
- 4xday
- PRN

If PRN How often dow you take the medication?

\_\_\_\_\_

Name of Medication 16

\_\_\_\_\_

Class of Medication

- Anticoagulants
- Antidepressants
- Antipsychotics
- Beta-blockers
- Diuretics
- (Other) Antihypertensives
- NSAIDs
- Narcotics
- Opioids
- Benzodiazepines
- (Other) Sedatives

Dosage

\_\_\_\_\_

Frequency

- 1xday
- 2xday
- 3xday
- 4xday
- PRN

If PRN How often dow you take the medication?

\_\_\_\_\_

Name of Medication 17

\_\_\_\_\_



Class of Medication

- Anticoagulants
- Antidepressants
- Antipsychotics
- Beta-blockers
- Diuretics
- (Other) Antihypertensives
- NSAIDs
- Narcotics
- Opioids
- Benzodiazepines
- (Other) Sedatives

Dosage

\_\_\_\_\_

Frequency

- 1xday
- 2xday
- 3xday
- 4xday
- PRN

If PRN How often do you take the medication?

\_\_\_\_\_

Name of Medication 18

\_\_\_\_\_

Class of Medication

- Anticoagulants
- Antidepressants
- Antipsychotics
- Beta-blockers
- Diuretics
- (Other) Antihypertensives
- NSAIDs
- Narcotics
- Opioids
- Benzodiazepines
- (Other) Sedatives

Dosage

\_\_\_\_\_

Frequency

- 1xday
- 2xday
- 3xday
- 4xday
- PRN

If PRN How often do you take the medication?

\_\_\_\_\_

Name of Medication 19

\_\_\_\_\_

Class of Medication

- Anticoagulants
- Antidepressants
- Antipsychotics
- Beta-blockers
- Diuretics
- (Other) Antihypertensives
- NSAIDs
- Narcotics
- Opioids
- Benzodiazepines
- (Other) Sedatives

Dosage

\_\_\_\_\_

Frequency

- 1xday
- 2xday
- 3xday
- 4xday
- PRN

If PRN How often do you take the medication?

---

Name of Medication 20

---

Class of Medication

- Anticoagulants
- Antidepressants
- Antipsychotics
- Beta-blockers
- Diuretics
- (Other) Antihypertensives
- NSAIDs
- Narcotics
- Opioids
- Benzodiazepines
- (Other) Sedatives

Dosage

---

Frequency

- 1xday
- 2xday
- 3xday
- 4xday
- PRN

If PRN How often do you take the medication?

---

Name of Medication 21

---

Class of Medication

- Anticoagulants
- Antidepressants
- Antipsychotics
- Beta-blockers
- Diuretics
- (Other) Antihypertensives
- NSAIDs
- Narcotics
- Opioids
- Benzodiazepines
- (Other) Sedatives

Dosage

---

Frequency

- 1xday
- 2xday
- 3xday
- 4xday
- PRN

If PRN How often do you take the medication?

---

Name of Medication 22

---

Class of Medication

- Anticoagulants
- Antidepressants
- Antipsychotics
- Beta-blockers
- Diuretics
- (Other) Antihypertensives
- NSAIDs
- Narcotics
- Opioids
- Benzodiazepines
- (Other) Sedatives

Dosage

---

Frequency

- 1xday
- 2xday
- 3xday
- 4xday
- PRN

If PRN How often dow you take the medication?

\_\_\_\_\_

Name of Medication 23

\_\_\_\_\_

Class of Medication

- Anticoagulants
- Antidepressants
- Antipsychotics
- Beta-blockers
- Diuretics
- (Other) Antihypertensives
- NSAIDs
- Narcotics
- Opioids
- Benzodiazepines
- (Other) Sedatives

Dosage

\_\_\_\_\_

Frequency

- 1xday
- 2xday
- 3xday
- 4xday
- PRN

If PRN How often dow you take the medication?

\_\_\_\_\_

Name of Medication 24

\_\_\_\_\_

Class of Medication

- Anticoagulants
- Antidepressants
- Antipsychotics
- Beta-blockers
- Diuretics
- (Other) Antihypertensives
- NSAIDs
- Narcotics
- Opioids
- Benzodiazepines
- (Other) Sedatives

Dosage

\_\_\_\_\_

Frequency

- 1xday
- 2xday
- 3xday
- 4xday
- PRN

If PRN How often dow you take the medication?

\_\_\_\_\_

Name of Medication 25

\_\_\_\_\_

Class of Medication

- Anticoagulants
- Antidepressants
- Antipsychotics
- Beta-blockers
- Diuretics
- (Other) Antihypertensives
- NSAIDs
- Narcotics
- Opioids
- Benzodiazepines
- (Other) Sedatives

Dosage

\_\_\_\_\_

Frequency

- 1xday
- 2xday
- 3xday
- 4xday
- PRN

If PRN How often do you take the medication?

\_\_\_\_\_

Name of Medication 26

\_\_\_\_\_

Class of Medication

- Anticoagulants
- Antidepressants
- Antipsychotics
- Beta-blockers
- Diuretics
- (Other) Antihypertensives
- NSAIDs
- Narcotics
- Opioids
- Benzodiazepines
- (Other) Sedatives

Dosage

\_\_\_\_\_

Frequency

- 1xday
- 2xday
- 3xday
- 4xday
- PRN

If PRN How often do you take the medication?

\_\_\_\_\_

Name of Medication 27

\_\_\_\_\_

Class of Medication

- Anticoagulants
- Antidepressants
- Antipsychotics
- Beta-blockers
- Diuretics
- (Other) Antihypertensives
- NSAIDs
- Narcotics
- Opioids
- Benzodiazepines
- (Other) Sedatives

Dosage

\_\_\_\_\_

Frequency

- 1xday
- 2xday
- 3xday
- 4xday
- PRN

If PRN How often do you take the medication?

---

Name of Medication 28

---

Class of Medication

- Anticoagulants
- Antidepressants
- Antipsychotics
- Beta-blockers
- Diuretics
- (Other) Antihypertensives
- NSAIDs
- Narcotics
- Opioids
- Benzodiazepines
- (Other) Sedatives

Dosage

---

Frequency

- 1xday
- 2xday
- 3xday
- 4xday
- PRN

If PRN How often do you take the medication?

---

Name of Medication 29

---

Class of Medication

- Anticoagulants
- Antidepressants
- Antipsychotics
- Beta-blockers
- Diuretics
- (Other) Antihypertensives
- NSAIDs
- Narcotics
- Opioids
- Benzodiazepines
- (Other) Sedatives

Dosage

---

Frequency

- 1xday
- 2xday
- 3xday
- 4xday
- PRN

If PRN How often do you take the medication?

---

Name of Medication 30

---

Class of Medication

- Anticoagulants
- Antidepressants
- Antipsychotics
- Beta-blockers
- Diuretics
- (Other) Antihypertensives
- NSAIDs
- Narcotics
- Opioids
- Benzodiazepines
- (Other) Sedatives

Dosage

---

Frequency

- 1xday
- 2xday
- 3xday

If PRN How often do you take the medication?

DO NOT FORGET TO SELECT FORM STATUS AND SAVE FORM
